# Supplementary material for: Multicentric Standardization of Protocols for the Diagnosis of Human Mitochondrial Respiratory Chain Defects
Source: MDPI journal article supplement (doi:10.3390/antiox11040741), 2022-04-08
Supplement: s1 [file s1]

**Supplementary Table S1.** Characteristics of the samples and individuals from the different sites of the study included as reference ranges (Table 3 and 5).

|         | TABLE 3                          |              |                                 |               |                                 |               |                                |               |                                 |               | TABLE 5                         |              |                                 |              |
|---------|----------------------------------|--------------|---------------------------------|---------------|---------------------------------|---------------|--------------------------------|---------------|---------------------------------|---------------|---------------------------------|--------------|---------------------------------|--------------|
|         | IBC U737 <sup>1</sup><br>(n=119) |              | HCL U722 <sup>2</sup><br>(n=29) |               | 12O U723 <sup>3</sup><br>(n=25) |               | VH U701 <sup>4</sup><br>(n=14) |               | UPO U729 <sup>5</sup><br>(n=75) |               | IBC U737 <sup>1</sup><br>(n=28) |              | HCL U722 <sup>2</sup><br>(n=11) |              |
|         | Range                            | Mean<br>± SD | Range                           | Mean<br>± SD  | Range                           | Mean<br>± SD  | Range                          | Mean<br>± SD  | Range                           | Mean<br>± SD  | Range                           | Mean<br>± SD | Range                           | Mean<br>± SD |
| Age     | 0-75                             | 41.5 ± 16.85 | 19 - 88                         | 62.04 ± 17.90 | 0.02 - 70                       | 26.16 ± 22.56 | 0.02 - 69                      | 19.45 ± 22.72 | 0 - 95                          | 23.47 ± 23.09 | 0,02-80                         | 35.6± 17.85  | 27 - 86                         | 65.0 ± 14.32 |
|         | Female/Male                      | %<br>Female  | Female/Male                     | %<br>Female   | Female/Male                     | %<br>Female   | Female/Male                    | %<br>Female   | Female/Male                     | %<br>Female   | Female/Male                     | %<br>Female  | Female/Male                     | %<br>Female  |
| Gender  | 65/54                            | 54.6         | 17/12                           | 58.6          | 10/15                           | 40            | 5/9                            | 30            | NA                              | NA            | 17/11                           | 30           | 6/5                             | 54.5         |
| Tissue  | quadriceps                       |              | deltoids                        |               | quadriceps/biceps               |               | quadriceps                     |               | NA                              |               | fibroblasts                     |              | PBMC                            |              |
| Fasting | NO                               |              | NO                              |               | NO                              |               | YES                            |               | NO                              |               | NO                              |              | NO                              |              |

<sup>1</sup> Inborn Errors of Metabolism Section (IBC U737), Molecular Genetics and Biochemistry Service, Hospital Clínic of Barcelona, IDIBAPS and CSIC, Barcelona, Spain

<sup>2</sup> Muscle Research and Mitochondrial Function Laboratory (U722), Cellex-IDIBAPS, Faculty of Medicine and Health Sciences-University of Barcelona, Internal Medicine Department-Hospital Clínic of Barcelona, Spain

<sup>3</sup> Mitochondrial Diseases Laboratory (U723), Research Institute, Universitary Hospital 12 de Octubre (imas12), Madrid, Spain

<sup>4</sup> Biochemistry Service (U701), Universitary Hospital Vall d’Hebron, Barcelona, Spain

<sup>5</sup> Bioenergetics and Cell Physiology Service (U729), Central Services of Research, University Pablo de Olavide, Sevilla, Spain
