# Supplementary material for: Multicentric Standardization of Protocols for the Diagnosis of Human Mitochondrial Respiratory Chain Defects
Source: MDPI journal article supplement (doi:10.3390/antiox11040741), 2022-04-08
Supplement: s1 [file s1]

**Supplementary Table S2.** Representative data of the control porcine sample analyzed in the participating institutions, used both as an internal control (for daily intra-lab analyses) and external reference (inter-lab comparison).

|                                         | Complex       | IBC<br>U737 <sup>1</sup> | HCL<br>U722 <sup>2</sup> | VH<br>U701 <sup>3</sup> | 12O<br>U723 <sup>4</sup> | UPO<br>U729 <sup>5</sup> | Mean   | SD    | CV    |
|-----------------------------------------|---------------|--------------------------|--------------------------|-------------------------|--------------------------|--------------------------|--------|-------|-------|
| Specific                                | CI            | 43.50                    | 41.42                    | 44.10                   | 44.60                    | 45.76                    | 43.85  | 1.60  | 3.66  |
|                                         | CII           | 43.80                    | 38.28                    | 33.00                   | 99.50                    | 40.73                    | 46.79  | 27.36 | 58.49 |
|                                         | CIII          | 83.30                    | 54.43                    | 51.60                   | 127.00                   | 36.40                    | 64.09  | 35.83 | 55.90 |
|                                         | CI+CIII       | 10.30                    | 13.62                    | 19.80                   | 37.60                    | 16.55                    | 17.68  | 10.67 | 60.36 |
|                                         | CII+CIII      | 22.00                    | 21.50                    | 15.40                   | 51.60                    | 20.00                    | 23.73  | 14.49 | 61.08 |
|                                         | CIV           | 76.10                    | 75.97                    | 77.80                   | 266.80                   | 67.71                    | 95.93  | 86.14 | 89.79 |
|                                         | CS            | 112.30                   | 136.64                   | 153.20                  | 291.20                   | 146.02                   | 158.48 | 70.65 | 44.58 |
| Relative to<br>Citrate<br>Synthase (CS) | CI / CS       | 0.39                     | 0.30                     | 0.29                    | 0.15                     | 0.31                     | 0.28   | 0.09  | 30.73 |
|                                         | CII / CS      | 0.39                     | 0.28                     | 0.22                    | 0.34                     | 0.28                     | 0.30   | 0.07  | 22.61 |
|                                         | CIII / CS     | 0.74                     | 0.40                     | 0.34                    | 0.44                     | 0.25                     | 0.40   | 0.19  | 46.18 |
|                                         | CI+CIII / CS  | 0.09                     | 0.10                     | 0.13                    | 0.13                     | 0.11                     | 0.11   | 0.02  | 15.22 |
|                                         | CII+CIII / CS | 0.20                     | 0.16                     | 0.10                    | 0.18                     | 0.14                     | 0.15   | 0.04  | 24.67 |
|                                         | CIV / CS      | 0.68                     | 0.56                     | 0.51                    | 0.92                     | 0.46                     | 0.61   | 0.18  | 30.02 |

<sup>1</sup> Inborn Errors of Metabolism Section (IBC U737), Molecular Genetics and Biochemistry Service, Hospital Clínic of Barcelona, IDIBAPS and CSIC, Barcelona, Spain  
<sup>2</sup> Muscle Research and Mitochondrial Function Laboratory (U722), Cellex-IDIBAPS, Faculty of Medicine and Health Sciences-University of Barcelona, Internal Medicine Department-Hospital Clínic of Barcelona, Spain  
<sup>3</sup> Mitochondrial Diseases Laboratory (U723), Research Institute, Universitary Hospital 12 de Octubre (imas12), Madrid, Spain  
<sup>4</sup> Biochemistry Service (U701), Universitary Hospital Vall d’Hebron, Barcelona, Spain  
<sup>5</sup> Bioenergetics and Cell Physiology Service (U729), Central Services of Research, University Pablo de Olavide, Sevilla, Spain
